# Supplementary figures and images for: Dupuytren’s Disease Is Mediated by Insufficient TGF-β1 Release and Degradation
Source: MDPI journal article supplement (doi:10.3390/ijms242015097), 2023-10-11

A

Cell count (relative % )

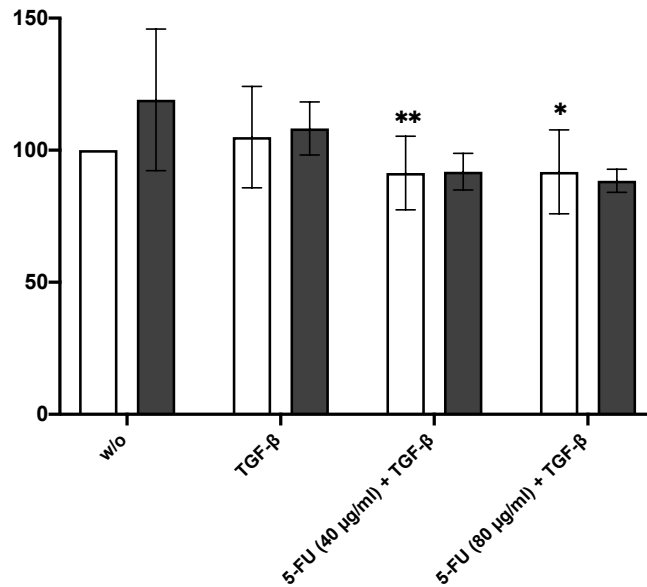

B

Cell count (relative % )

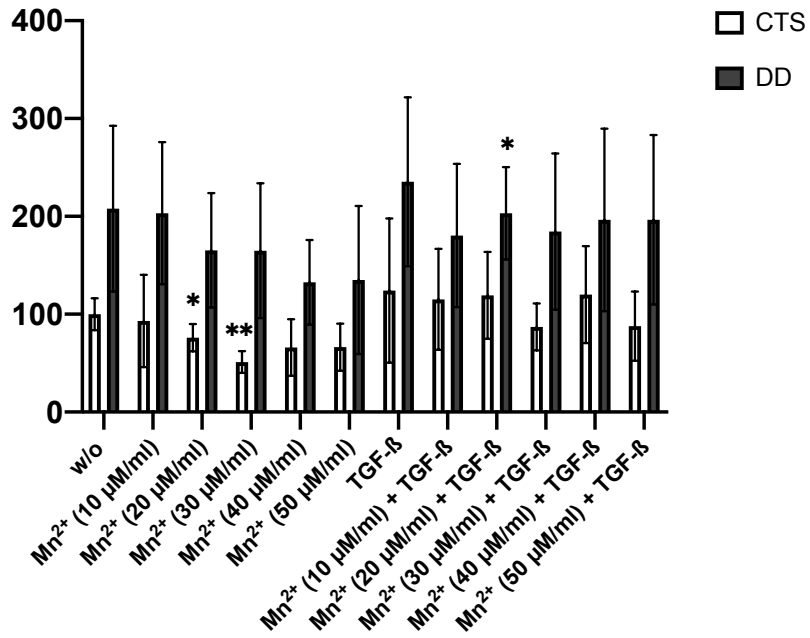

Supplement: s1 [file s1]

A

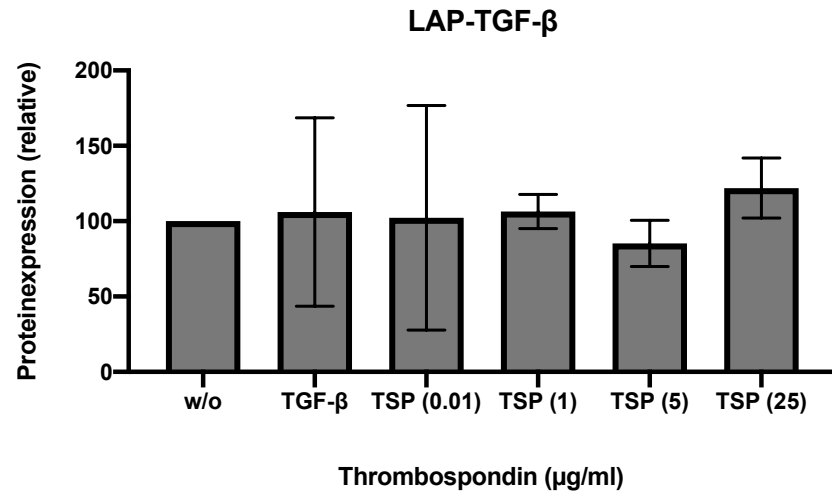

B

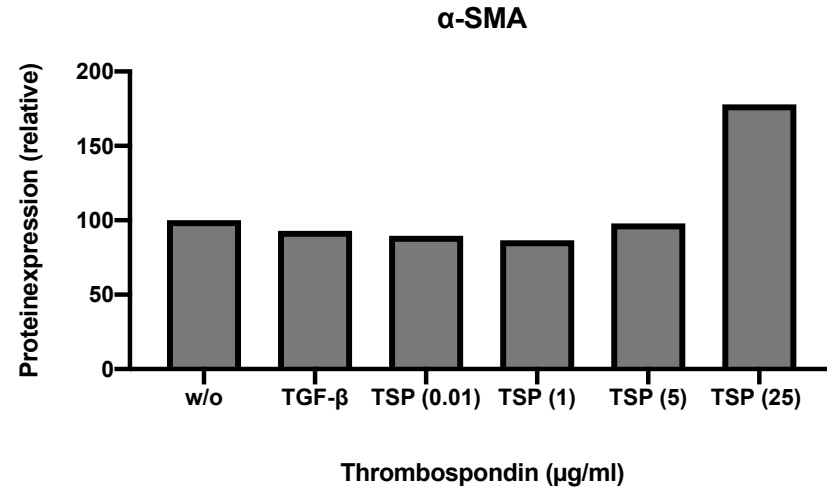

C

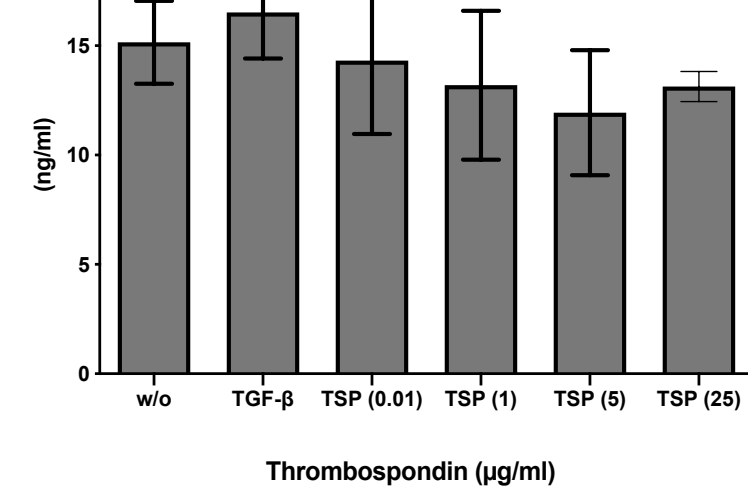

Supplement: s1 [file s1]

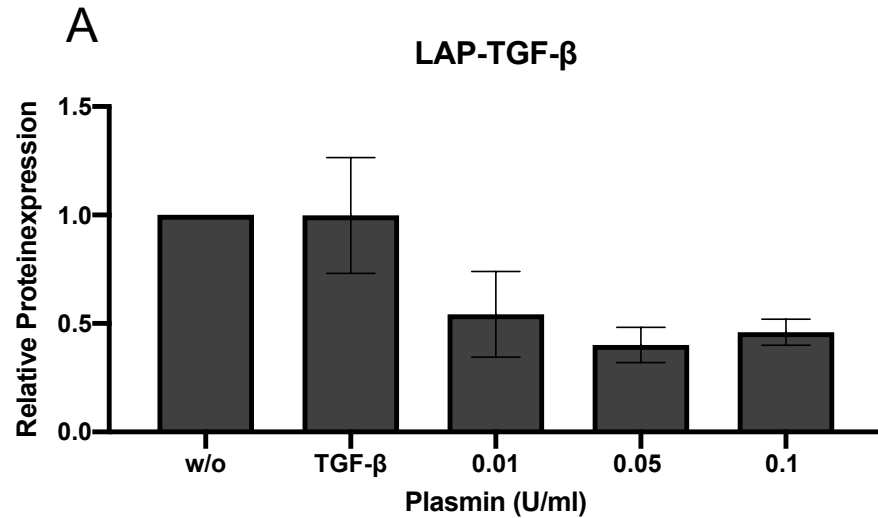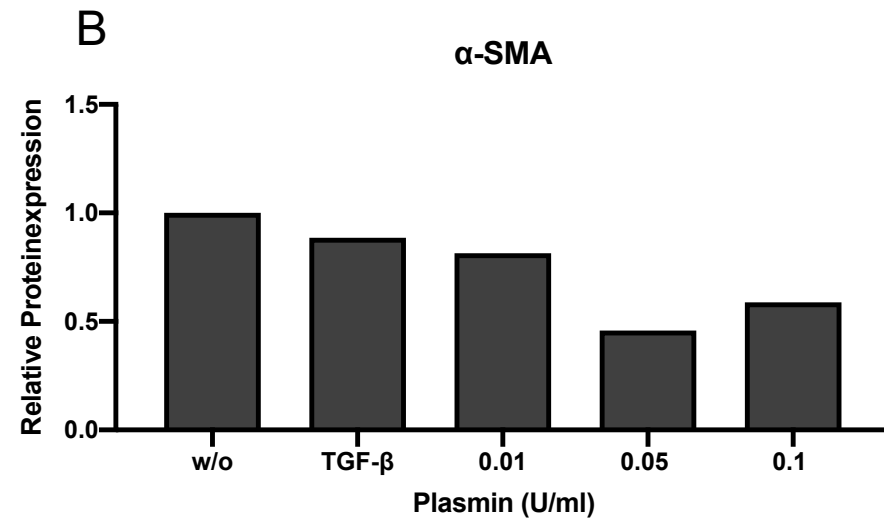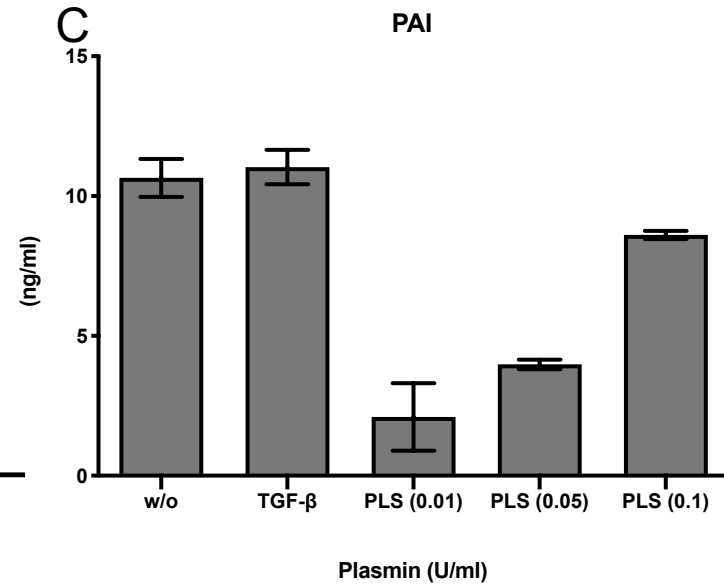

Supplement: s1 [file s1]

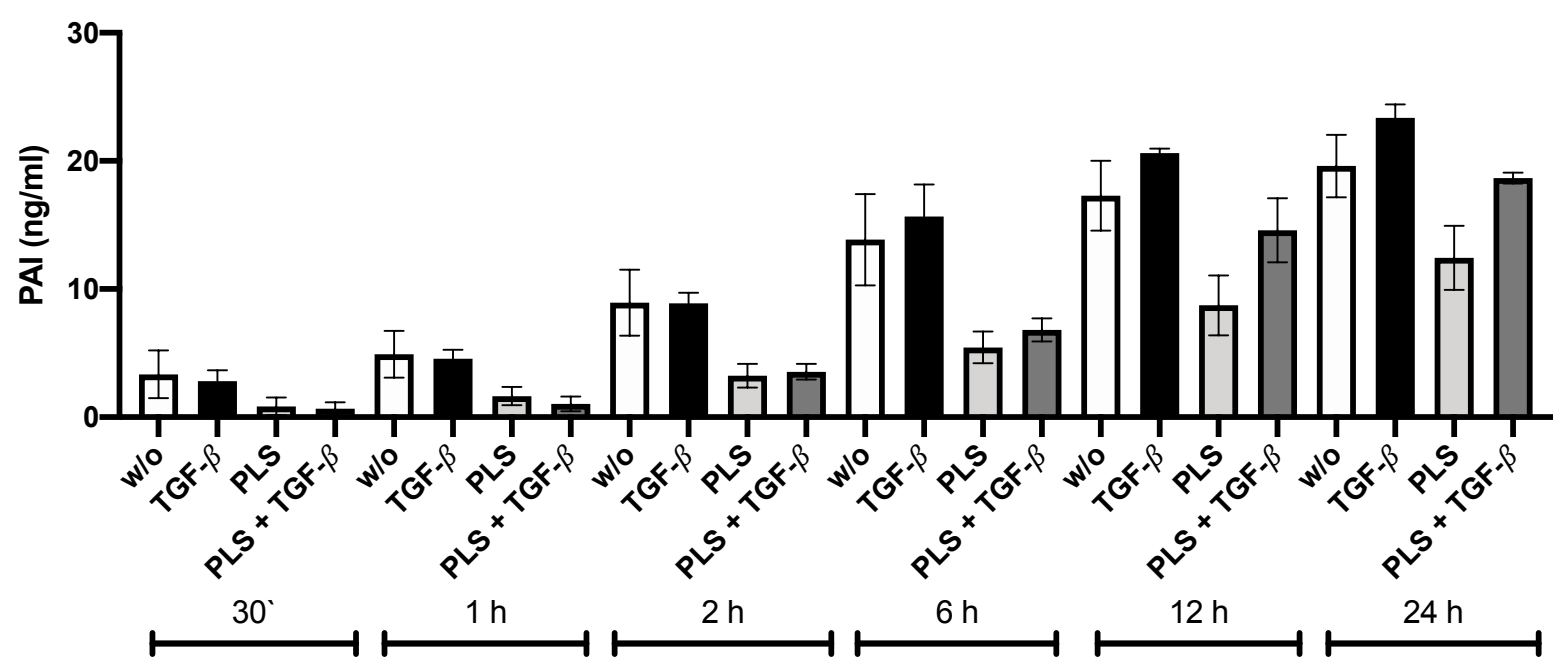

Supplement: s1 [file s1]
